# Supplementary material
Source: MDPI journal article supplement (https://www.mdpi.com/2071-1050/14/9/4878)
Supplement: s1 [file s1]

## Article

# On the Micro-Foundations of Creative Economy: Life Satisfaction and Social Identity

Panagiotis E. Petrakis \* and Anna-Maria Kanzola

Department of Economics, National and Kapodistrian University of Athens, 10562 Athens, Greece

\* Correspondence: ppetrak@econ.uoa.gr; Tel.: +30-210-368-9353

**Citation:** Petrakis, P.E. and Kanzola, A.M. On the Micro-Foundations of Creative Economy: Life Satisfaction and Social Identity. *Sustainability* **2022**, *14*, 4878. <https://doi.org/10.3390/su14094878>

Academic Editor: Jung-ho Baek

Received: 19 March 2022

Accepted: 17 April 2022

Published: 19 April 2022

**Publisher's Note:** MDPI stays neutral with regard to jurisdictional claims in published maps and institutional affiliations.

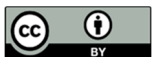

**Copyright:** © 2022 by the authors. Submitted for possible open access publication under the terms and conditions of the Creative Commons Attribution (CC BY) license (<https://creativecommons.org/licenses/by/4.0/>).

## Sample Size Information

This study conducted field research within Greek society over 2 years (2019–2020) and used a sample size of 800 people each year. It was conducted by a survey bureau, a member of the European Society for Opinion and Market Research (ESOMAR), and the Market Research and Public Opinion Companies' Association (SEDEA), who conducted household interviews, using a printed questionnaire. The sample choice was made proportional to the population size sampling.

The total population of respondents comprised males and females who were over the age of 18, were from the urban and rural areas of the Greek mainland and islands and who had sufficient knowledge of the Greek language for the purpose of the interview. The results were analyzed according to the population's distribution of age and sex.

In total, 51% were female and 49% were male. Regarding age, 10% were 18–24 years old, 7% were 25–34 years old, 18% were 35–44 years old, 17% were 45–54 years old, 14% were 55–64 years old and 24% were 65 years old or older. Regarding education, 24% had attained primary education, 50% had attained high school education and 26% had attained tertiary education. Regarding occupation, 17% were freelance professionals; 3% were farmers, producers and stockbreeders; 36% were daily wage earners; 9% were unemployed; 8% were housewives; 6% were students; and 22% were pensioners.

### 1. The Variables of Social Identity

| Name of Variable                                           | Question                                                               | Scale of Answers and Quantification                                                                      |
|------------------------------------------------------------|------------------------------------------------------------------------|----------------------------------------------------------------------------------------------------------|
| 1. <u>Degree of Life Satisfaction and Individual State</u> |                                                                        |                                                                                                          |
| Happiness                                                  | In general, how happy would you say you are?                           | Perfectly Unhappy to Exceptionally Happy                                                                 |
|                                                            |                                                                        | Scale from 0 to 10                                                                                       |
| Satisfaction                                               | Overall, how satisfied are you with your life today?                   | Perfectly Dissatisfied to Exceptionally Satisfied                                                        |
|                                                            |                                                                        | Scale from 0 to 10                                                                                       |
| State of Health                                            | How would you assess your current state of health?                     | Very good, good, average, poor, very poor                                                                |
|                                                            |                                                                        | 1,2,3,4,5 (respectively)                                                                                 |
| Security                                                   | Is it important for you to live in a safe environment?                 | Extremely so, yes it's important, it's somewhat important, a little, not important, not important at all |
|                                                            |                                                                        | 1,2,3,4,5,6 (respectively)                                                                               |
| 2. <u>Identity Traits</u>                                  |                                                                        |                                                                                                          |
| 2.1 <u>Basic Traits</u>                                    |                                                                        |                                                                                                          |
| Creativity                                                 | Is it important for you to be creative and have new ideas?             | Extremely so, yes it's important, it's somewhat important, a little, not important, not important at all |
|                                                            |                                                                        | 1,2,3,4,5,6 (respectively)                                                                               |
| Equitability                                               | Do you believe that all people in the world should be treated equally? | Extremely so, yes it's important, it's somewhat important, a little, not important, not important at all |
|                                                            |                                                                        | 1,2,3,4,5,6 (respectively)                                                                               |

|                                   |                                                                                                                       |                                                                                                          |
|-----------------------------------|-----------------------------------------------------------------------------------------------------------------------|----------------------------------------------------------------------------------------------------------|
| Inequality and the State          | Do you agree that government must take measures to reduce the income gap?                                             | Completely agree, agree, neither agree nor disagree, disagree, completely disagree.                      |
|                                   |                                                                                                                       | 1,2,3,4,5 (respectively)                                                                                 |
| Megalothymia                      | Is it important for you to show your abilities?                                                                       | Extremely so, yes it's important, it's somewhat important, a little, not important, not important at all |
|                                   |                                                                                                                       | 1,2,3,4,5,6 (respectively)                                                                               |
| Religiosity                       | Regardless of whether you belong to a specific religion, how religious would you say you are on a scale from 0 to 10? | Not religious at all to Extremely religious                                                              |
|                                   |                                                                                                                       | Scale from 0 to 10                                                                                       |
| Tradition                         | Is tradition important for you?                                                                                       | Extremely so, yes it's important, it's somewhat important, a little, not important, not important at all |
|                                   |                                                                                                                       | 1,2,3,4,5,6 (respectively)                                                                               |
| Adherence to rules                | Do you believe that schools need to teach children to adhere to rules and to be disciplined?                          | Completely agree, agree, neither agree nor disagree, disagree, completely disagree.                      |
|                                   |                                                                                                                       | 1,2,3,4,5 (respectively)                                                                                 |
| Acknowledgment of external values | Do you believe that people should do what they are told?                                                              | Very much so, yes, somewhat, a little, not so, not at all                                                |
|                                   |                                                                                                                       | 1,2,3,4,5,6 (respectively)                                                                               |
| Having a good time                | It is important for you to have a good time?                                                                          | Very much so, yes, somewhat, a little, not so, not at all                                                |
|                                   |                                                                                                                       | 1,2,3,4,5,6 (respectively)                                                                               |
| Lending                           | How difficult or easy would it be to borrow money?                                                                    | Very difficult, difficult, somehow difficult, easy, very easy                                            |
|                                   |                                                                                                                       | 1,2,3,4,5, (respectively)                                                                                |
| Family                            | The main priority in a person's life should be his family                                                             | Agree, probably agree, probably disagree, disagree                                                       |
|                                   |                                                                                                                       | 1,2,3,4 (respectively)                                                                                   |

## 2.2. Life Attitudes

|                   |                                                                                                                       |                                                                                     |
|-------------------|-----------------------------------------------------------------------------------------------------------------------|-------------------------------------------------------------------------------------|
| Role of migrants  | Do you believe that our culture is enriched by the presence of migrants in our country?                               | Agree, probably agree, probably disagree, disagree                                  |
|                   |                                                                                                                       | 1,2,3,4 (respectively)                                                              |
| Role of the state | Do you agree with the following sentence?<br>The less the state intervenes in the economy, the better for the country | Completely agree, agree, neither agree nor disagree, disagree, completely disagree. |
|                   |                                                                                                                       | 1,2,3,4,5 (respectively)                                                            |
| Cultural change   | Overall, is the cultural life of Greece downgraded or enriched by people coming to live here from other countries?    | Cultural life is downgraded to Cultural life is enriched                            |
|                   |                                                                                                                       | Scale from 0 to 10                                                                  |

|                                |                                                                                             |                                                                                                          |
|--------------------------------|---------------------------------------------------------------------------------------------|----------------------------------------------------------------------------------------------------------|
| Altruism                       | Is it important for you to help others?                                                     | Extremely so, yes it's important, it's somewhat important, a little, not important, not important at all |
|                                |                                                                                             | 1,2,3,4,5,6 (respectively)                                                                               |
| Environment                    | Do you firmly believe that it is important for people to take care of nature?               | Extremely so, yes it's important, it's somewhat important, a little, not important, not important at all |
|                                |                                                                                             | 1,2,3,4,5,6 (respectively)                                                                               |
| Trust                          | Generally speaking, would you say that we can trust people or we should always be cautious? | We should always be cautious to We can trust most people                                                 |
|                                |                                                                                             | Scale from 0 to 10                                                                                       |
| Motive for wealth accumulation | Is it important for you to be wealthy?                                                      | Extremely so, yes it's important, it's somewhat important, a little, not important, not important at all |
|                                |                                                                                             | 1,2,3,4,5,6 (respectively)                                                                               |
| Surprises                      | Do you enjoy surprises and experiencing new things?                                         | Extremely so, yes, moderately so, a little, not so, not at all.                                          |
|                                |                                                                                             | 1,2,3,4,5,6 (respectively)                                                                               |
| Making decisions               | Is it important for you to make decisions about the things you do?                          | Extremely so, yes it's important, it's somewhat important, a little, not important, not important at all |
|                                |                                                                                             | 1,2,3,4,5,6 (respectively)                                                                               |
| Successful                     | Is it important for you to be successful?                                                   | Extremely so, yes it's important, it's somewhat important, a little, not important, not important at all |
|                                |                                                                                             | 1,2,3,4,5,6 (respectively)                                                                               |
| Adventure-Seeking              | Do you seek adventure and do you enjoy taking risks?                                        | Extremely so, yes, moderately so, a little, not so, not at all.                                          |
|                                |                                                                                             | 1,2,3,4,5,6 (respectively)                                                                               |
| Political self-definition      | How would you position yourself in politics?                                                | Left to Right                                                                                            |
|                                |                                                                                             | Scale from 0 to 10                                                                                       |

### 3. Demographics

|               |                                                                                                        |                                                                                                                                                               |
|---------------|--------------------------------------------------------------------------------------------------------|---------------------------------------------------------------------------------------------------------------------------------------------------------------|
| Income status | In which of the following categories does the total monthly income after tax of your household belong? | <700 euro, 701-1000 euro, 1001-1250 euro, 1251-1500 euro, 1501-1750 euro, 1750 -2000 euro, 2001-2500 euro, 2501-3000 euro, 3001-4000 euro, 4001 euro and over |
|               |                                                                                                        | 1,2,3,4,5,6,7,8,9,10 (respectively)                                                                                                                           |
| Age           | In what age category do you fall under?                                                                | 18-24, 25-34, 35-44, 45-54, 55-64, 65+ years of age                                                                                                           |
|               |                                                                                                        | 1,2,3,4,5,6 (respectively)                                                                                                                                    |

|                    |                                                           |                                                                                                                                                                                                                                                                                                              |
|--------------------|-----------------------------------------------------------|--------------------------------------------------------------------------------------------------------------------------------------------------------------------------------------------------------------------------------------------------------------------------------------------------------------|
| Level of education | What is the highest level of education you have attained? | Attended some primary school, graduated from primary school, three years of high school, graduated from six years of high school/lyceum, graduated from technical school /vocational training Institute, graduated from technical college, graduated from tertiary education, completed postgraduate studies |
|                    |                                                           | 1,2,3,4,5,6,7,8 (respectively)                                                                                                                                                                                                                                                                               |

## 2. Social Identity (2019-2020)

### 2.1 The Results of the Principal Components Analysis

| Importance of components: |         |         |         |         |         |         |         |         |         |         |
|---------------------------|---------|---------|---------|---------|---------|---------|---------|---------|---------|---------|
|                           | PC1     | PC2     | PC3     | PC4     | PC5     | PC6     | PC7     | PC8     | PC9     | PC10    |
| Standard deviation        | 2.1106  | 1.8255  | 1.40989 | 1.22613 | 1.11699 | 1.07993 | 1.0442  | 1.01532 | 0.99831 | 0.95815 |
| Proportion of Variance    | 0.1536  | 0.1149  | 0.06854 | 0.05184 | 0.04302 | 0.04022 | 0.0376  | 0.03555 | 0.03437 | 0.03166 |
| Cumulative Proportion     | 0.1536  | 0.2685  | 0.33705 | 0.3889  | 0.43192 | 0.47213 | 0.5097  | 0.54528 | 0.57965 | 0.6113  |
|                           | PC11    | PC12    | PC13    | PC14    | PC15    | PC16    | PC17    | PC18    | PC19    | PC20    |
| Standard deviation        | 0.93265 | 0.89515 | 0.87455 | 0.87411 | 0.855   | 0.82838 | 0.81562 | 0.79957 | 0.78536 | 0.7615  |
| Proportion of Variance    | 0.02999 | 0.02763 | 0.02637 | 0.02635 | 0.0252  | 0.02366 | 0.02294 | 0.02205 | 0.02127 | 0.02    |
| Cumulative Proportion     | 0.6413  | 0.66893 | 0.6953  | 0.72165 | 0.7469  | 0.77052 | 0.79346 | 0.8155  | 0.83677 | 0.8568  |
|                           | PC21    | PC22    | PC23    | PC24    | PC25    | PC26    | PC27    | PC28    | PC29    |         |
| Standard deviation        | 0.75662 | 0.7344  | 0.72572 | 0.70966 | 0.67869 | 0.6529  | 0.63573 | 0.60749 | 0.59296 |         |
| Proportion of Variance    | 0.01974 | 0.0186  | 0.01816 | 0.01737 | 0.01588 | 0.0147  | 0.01394 | 0.01273 | 0.01212 |         |
| Cumulative Proportion     | 0.87651 | 0.8951  | 0.91326 | 0.93063 | 0.94651 | 0.9612  | 0.97515 | 0.98788 | 1       |         |

|                                   | PC1      | PC2      | PC3      | PC4      | PC5      | PC6      | PC7      | PC8      | PC9      | PC10     |
|-----------------------------------|----------|----------|----------|----------|----------|----------|----------|----------|----------|----------|
| Happiness                         | -0.12952 | 0.033403 | -0.16451 | 0.524409 | -0.00532 | 0.178467 | -0.0913  | 0.059431 | 0.039245 | 0.041173 |
| Security                          | -0.02039 | -0.26264 | -0.17123 | -0.14759 | -0.0445  | 0.242466 | -0.04606 | 0.194899 | -0.27665 | 0.206976 |
| Creativity                        | 0.308159 | -0.12151 | 0.003173 | -0.06971 | -0.00019 | 0.015605 | 0.088515 | -0.15132 | -0.04799 | -0.15767 |
| Equitability                      | 0.104229 | -0.18248 | -0.35733 | -0.08238 | -0.24433 | 0.015406 | -0.00259 | 0.058404 | -0.00633 | -0.11347 |
| Inequality                        | 0.009718 | -0.11334 | -0.36778 | 0.128164 | -0.07356 | -0.19854 | -0.02103 | -0.12651 | 0.342035 | 0.322511 |
| Megalothymia                      | 0.262607 | -0.1679  | 0.115393 | 0.087789 | 0.299333 | 0.086346 | 0.065179 | 0.049442 | -0.06812 | 0.225854 |
| Religiosity                       | 0.212614 | 0.232888 | -0.20063 | 0.140017 | -0.04585 | 0.185762 | -0.09981 | 0.057363 | -0.08558 | -0.04161 |
| Tradition                         | -0.13772 | -0.38568 | -0.0443  | -0.11649 | 0.054727 | 0.084391 | 0.027146 | -0.03146 | -0.09598 | -0.05435 |
| Adherence to rules                | -0.13264 | -0.30736 | 0.040418 | -0.16464 | 0.273386 | -0.0283  | 0.033068 | -0.114   | 0.116522 | 0.088749 |
| Acknowledgment of external values | -0.09441 | -0.15947 | 0.142003 | 0.245967 | 0.24951  | -0.27264 | -0.26682 | -0.03911 | -0.14072 | -0.1282  |
| Having a good time                | 0.261574 | -0.17979 | 0.110055 | 0.190947 | -0.02215 | 0.07269  | 0.008739 | 0.168008 | 0.045881 | 0.049035 |
| The role of migrants              | 0.149788 | 0.192302 | -0.29773 | -0.09972 | 0.441788 | -0.10377 | 0.162145 | 0.13757  | -0.0884  | -0.06324 |
| Role of state                     | 0.038204 | -0.06126 | -0.00189 | 0.24371  | 0.230576 | -0.40798 | -0.37556 | -0.23723 | -0.10738 | -0.15045 |

|                                       |          |          |          |          |          |          |          |          |          |          |
|---------------------------------------|----------|----------|----------|----------|----------|----------|----------|----------|----------|----------|
| <b>Cultural change</b>                | -0.12793 | -0.24318 | 0.22443  | 0.220968 | -0.43628 | 0.162882 | -0.11747 | -0.1488  | 0.063754 | 0.122415 |
| <b>Altruism</b>                       | 0.018659 | -0.18284 | -0.30192 | -0.04331 | 0.02431  | -0.18358 | -0.22732 | -0.03101 | 0.215007 | 0.367603 |
| <b>Environment</b>                    | 0.077431 | -0.23729 | -0.35633 | -0.05776 | -0.06117 | 0.083181 | -0.08786 | 0.029763 | -0.12509 | -0.25372 |
| <b>Trust</b>                          | -0.0807  | 0.036026 | -0.0664  | 0.126114 | 0.20286  | 0.521899 | 0.046273 | -0.50659 | 0.036891 | -0.09419 |
| <b>Motive for wealth accumulation</b> | 0.241482 | -0.12215 | 0.215324 | 0.230666 | 0.054764 | 0.027991 | 0.014068 | 0.20363  | 0.046734 | 0.23756  |
| <b>Surprises</b>                      | 0.290249 | -0.15284 | 0.015928 | 0.030591 | -0.06874 | -0.11102 | 0.139516 | -0.21445 | 0.046168 | -0.2022  |
| <b>Makes decisions</b>                | 0.206802 | -0.19548 | -0.18635 | 0.130814 | -0.11905 | 0.029254 | -0.09067 | 0.127154 | -0.10663 | -0.37111 |
| <b>Successful</b>                     | 0.264283 | -0.16491 | 0.131556 | 0.073886 | 0.259176 | 0.201996 | 0.174728 | 0.120609 | 0.013864 | 0.141477 |
| <b>Seeks adventure</b>                | 0.320091 | -0.08053 | 0.13129  | 0.153977 | -0.11854 | -0.0902  | 0.094408 | -0.04245 | 0.179946 | -0.14249 |
| <b>Political self-definition</b>      | 0.099598 | 0.213657 | -0.28652 | 0.1791   | 0.096323 | 0.088367 | 0.120569 | -0.08419 | 0.279085 | 0.107562 |
| <b>State of health</b>                | 0.26235  | 0.038532 | 0.088548 | -0.29861 | -0.13872 | -0.12004 | -0.00411 | -0.30065 | -0.10524 | 0.180009 |
| <b>Income status</b>                  | -0.11202 | -0.0531  | -0.07479 | 0.166952 | -0.17847 | -0.34154 | 0.510567 | 0.188581 | -0.19595 | 0.107212 |
| <b>Age</b>                            | 0.310029 | 0.106155 | 0.022592 | -0.17061 | -0.14506 | -0.05956 | -0.06684 | -0.27664 | 0.058428 | 0.122228 |
| <b>Level of education</b>             | -0.15519 | -0.13708 | 0.042272 | 0.045166 | 0.037404 | -0.08953 | 0.412614 | -0.04578 | 0.460609 | -0.32064 |
| <b>Ledings</b>                        | -0.07874 | -0.03191 | -0.1223  | 0.249215 | -0.02416 | -0.0855  | 0.362809 | -0.41664 | -0.50848 | 0.180684 |
| <b>Family</b>                         | -0.14278 | -0.3217  | -0.03151 | -0.16767 | 0.173243 | 0.050698 | 0.048685 | -0.07508 | 0.097715 | 0.008918 |

|                           | PC11     | PC12     | PC13     | PC14     | PC15     | PC16     | PC17     | PC18     | PC19     | PC20     |
|---------------------------|----------|----------|----------|----------|----------|----------|----------|----------|----------|----------|
| <b>Happiness</b>          | -0.10538 | -0.21075 | 0.218798 | 0.024793 | 0.086505 | 0.020566 | 0.293821 | -0.55789 | -0.00409 | -0.07371 |
| <b>Security</b>           | 0.07759  | 0.464509 | -0.30726 | 0.097465 | -0.05509 | -0.21174 | 0.005247 | -0.32413 | -0.19647 | -0.10626 |
| <b>Creativity</b>         | 0.094185 | -0.15313 | 0.091158 | -0.00313 | -0.05963 | 0.127069 | -0.29965 | -0.2441  | -0.26063 | 0.294798 |
| <b>Equitability</b>       | -0.07839 | 0.093485 | -0.04599 | -0.02471 | 0.139473 | 0.662732 | -0.19531 | -0.09496 | 0.293101 | -0.17539 |
| <b>Inequality</b>         | -0.14476 | -0.02331 | -0.27643 | 0.149971 | -0.53565 | -0.01209 | 0.156937 | 0.049843 | 0.000645 | 0.084331 |
| <b>Megalothymia</b>       | 0.126677 | -0.10548 | -0.05396 | 0.229311 | -0.15814 | 0.183179 | -0.13864 | -0.01958 | 0.383444 | 0.027825 |
| <b>Religiosity</b>        | -0.12362 | 0.178857 | 0.095916 | -0.0301  | -0.12813 | -0.13933 | -0.32132 | -0.01861 | -0.10848 | -0.12986 |
| <b>Tradition</b>          | 0.047381 | -0.07597 | 0.192455 | -0.03069 | -0.01732 | -0.16939 | 0.10395  | -0.05034 | -0.03635 | -0.03483 |
| <b>Adherence to rules</b> | -0.19101 | -0.00784 | 0.110547 | -0.07932 | -0.18038 | 0.233733 | 0.083801 | 0.081907 | -0.29252 | 0.185487 |

|                                   |          |          |          |          |          |          |          |          |          |          |
|-----------------------------------|----------|----------|----------|----------|----------|----------|----------|----------|----------|----------|
| Acknowledgment of external values | -0.50714 | 0.031232 | -0.11593 | -0.18674 | -0.10155 | -0.13565 | -0.37403 | 0.006313 | 0.132377 | -0.26182 |
| Having a good time                | -0.12093 | 0.241532 | -0.16618 | -0.12197 | 0.228454 | 0.003312 | 0.131969 | 0.311277 | -0.26386 | -0.01574 |
| The role of migrants              | -0.10673 | -0.11809 | -0.07813 | -0.13966 | 0.083918 | -0.01487 | 0.120376 | -0.19283 | -0.1148  | 0.063088 |
| Role of state                     | 0.508225 | 0.364503 | 0.062796 | 0.065155 | 0.015307 | 0.096957 | 0.174205 | -0.054   | 0.032855 | 0.027249 |
| Cultural change                   | 0.089824 | -0.035   | 0.096087 | -0.01588 | -0.04314 | -0.00097 | -0.12864 | 0.026932 | -0.03478 | 0.010094 |
| Altruism                          | 0.142715 | -0.28102 | -0.12045 | -0.14616 | 0.577982 | -0.18969 | -0.19047 | 0.067164 | -0.02115 | -0.00095 |
| Environment                       | -0.0445  | -0.01776 | 0.245851 | 0.090234 | -0.06681 | -0.42157 | -0.03259 | 0.16168  | 0.373822 | 0.359707 |
| Trust                             | 0.133406 | -0.0024  | -0.33622 | -0.4535  | -0.02336 | -0.00356 | 0.006288 | 0.050807 | 0.158195 | 0.061184 |
| Motive for wealth accumulation    | -0.14128 | 0.202551 | 0.12876  | -0.25316 | 0.094097 | 0.083088 | -0.01651 | -0.13277 | 0.072733 | 0.490805 |
| Surprises                         | 0.160014 | -0.12594 | -0.18039 | 0.091976 | -0.05832 | -0.12313 | -0.22322 | -0.19682 | -0.27669 | -0.11049 |
| Makes decisions                   | -0.06228 | -0.09713 | -0.05773 | -0.15821 | -0.02273 | 0.132699 | 0.390854 | 0.291489 | -0.1293  | -0.06242 |
| Successful                        | 0.154726 | -0.1059  | 0.046879 | 0.175986 | 0.007382 | -0.09314 | 0.113402 | 0.163065 | 0.196002 | -0.38042 |
| Seeks adventure                   | -0.05909 | -0.17991 | 0.021031 | 0.035251 | -0.0311  | -0.18206 | 0.068087 | -0.07693 | -0.04136 | -0.10252 |
| Political self-definition         | 0.088765 | 0.306593 | 0.431204 | -0.01023 | -0.04155 | -0.01074 | -0.20073 | 0.246982 | -0.15211 | -0.09712 |
| State of health                   | -0.17009 | 0.177642 | 0.175082 | -0.20125 | 0.018681 | -0.0969  | 0.196914 | -0.15011 | 0.208307 | -0.00428 |
| Income status                     | 0.278266 | -0.01334 | 0.015845 | -0.50884 | -0.19827 | -0.07985 | -0.04949 | -0.00484 | 0.111428 | -0.09111 |
| Age                               | -0.15843 | 0.064308 | 0.042868 | -0.10515 | 0.027246 | -0.05471 | 0.24695  | -0.11154 | 0.098443 | -0.23282 |
| Level of education                | -0.12661 | 0.360809 | -0.1375  | 0.171422 | 0.267745 | -0.11872 | 0.019646 | -0.1591  | 0.201734 | 0.048085 |
| Ledings                           | -0.23351 | 0.002277 | 0.033438 | 0.328842 | 0.257678 | 0.059539 | 0.031504 | 0.174762 | -0.106   | 0.059272 |
| Family                            | -0.01875 | 0.039174 | 0.409129 | -0.1387  | -0.02382 | 0.056478 | -0.02129 | -0.07716 | -0.12155 | -0.32937 |

|            | PC21     | PC22     | PC23     | PC24     | PC25     | PC26     | PC27     | PC28     | PC29     |
|------------|----------|----------|----------|----------|----------|----------|----------|----------|----------|
| Happiness  | 0.022415 | 0.05756  | 0.133966 | 0.078067 | -0.22438 | -0.00719 | 0.180095 | 0.083576 | -0.02106 |
| Security   | 0.053333 | 0.140425 | 0.108606 | -0.17226 | 0.172584 | 0.003646 | 0.119097 | -0.09706 | -0.11519 |
| Creativity | -0.20267 | 0.353858 | 0.0481   | 0.356274 | 0.268607 | 0.131464 | 0.153522 | 0.226429 | -0.05396 |



|                                   |          |          |          |          |          |          |          |          |          |
|-----------------------------------|----------|----------|----------|----------|----------|----------|----------|----------|----------|
| Equitability                      | 0.216787 | -0.12897 | 0.110162 | 0.08087  | 0.055131 | -0.07001 | -0.06549 | -0.03013 | 0.097692 |
| Inequality                        | -0.06475 | -0.03828 | -0.1994  | 0.202399 | 0.106447 | -0.0706  | -0.01118 | 0.047774 | 0.079323 |
| Megalothymia                      | -0.11128 | 0.128252 | -0.11359 | -0.15122 | -0.33121 | 0.132111 | -0.10132 | -0.08141 | -0.45292 |
| Religiosity                       | -0.50199 | -0.32529 | 0.13871  | 0.019253 | -0.13579 | -0.06947 | -0.37153 | 0.131897 | 0.01538  |
| Tradition                         | 0.251562 | 0.183768 | -0.12618 | 0.187315 | -0.09047 | -0.2208  | -0.66453 | 0.235084 | 0.004272 |
| Adherence to rules                | -0.04906 | -0.11699 | 0.604042 | -0.21623 | -0.18992 | 0.068646 | -0.01089 | -0.00745 | 0.059211 |
| Acknowledgment of external values | 0.100069 | 0.234146 | 0.013448 | 0.018828 | 0.066569 | 0.014908 | 0.075274 | -0.01038 | 0.049433 |
| Having a good time                | 0.174073 | -0.15285 | -0.03229 | 0.486372 | -0.29374 | 0.183939 | 0.09975  | 0.084446 | -0.17831 |
| The role of migrants              | 0.070577 | -0.04162 | -0.11547 | 0.114124 | 0.061497 | 0.324087 | -0.2505  | -0.47584 | 0.144654 |
| Role of state                     | -0.044   | -0.12237 | 0.071831 | 0.070418 | 0.072522 | 0.031252 | -0.0772  | -0.00432 | 0.031299 |
| Cultural change                   | -0.10216 | 0.071743 | -0.01056 | 0.040203 | 0.023965 | 0.405499 | -0.21753 | -0.49901 | 0.188608 |
| Altruism                          | -0.17724 | 0.053901 | 0.082927 | -0.09559 | -0.00155 | -0.06432 | -0.01101 | 0.02588  | -0.05605 |
| Environment                       | 0.126042 | -0.17866 | 0.09063  | 0.00343  | -0.06186 | 0.20715  | 0.232818 | -0.00693 | 0.04108  |
| Trust                             | 0.049627 | -0.07031 | -0.00025 | 0.009363 | 0.075445 | -0.06652 | 0.026882 | 0.010817 | -0.0493  |
| Motive for wealth accumulation    | 0.054456 | -0.12966 | -0.25213 | -0.27594 | 0.193391 | -0.17164 | -0.07121 | 0.092908 | 0.248164 |
| Surprises                         | 0.218667 | -0.14809 | -0.18296 | -0.26271 | -0.43596 | -0.12071 | 0.121684 | -0.03815 | 0.306917 |
| Makes decisions                   | -0.33619 | 0.329621 | -0.13556 | -0.31881 | 0.004392 | -0.1053  | 0.008027 | -0.08311 | -0.02741 |
| Successful                        | -0.10446 | 0.027855 | 0.216754 | 0.142444 | 0.218414 | -0.05958 | 0.097669 | 0.046163 | 0.515179 |
| Seeks adventure                   | 0.206917 | -0.25737 | 0.272401 | -0.07062 | 0.414983 | -0.2028  | -0.12892 | -0.22494 | -0.44866 |
| Political self-definition         | 0.29795  | 0.386317 | 0.01971  | -0.13251 | -0.01211 | -0.05463 | 0.040959 | -0.12097 | -0.05536 |
| State of health                   | -0.16043 | 0.147089 | 0.071356 | 0.23784  | -0.25027 | -0.35843 | 0.111954 | -0.32548 | 0.020712 |
| Income status                     | -0.05039 | -0.00467 | 0.144733 | -0.00114 | -0.05933 | 0.09681  | 0.032929 | 0.102072 | -0.05452 |
| Age                               | 0.108636 | 0.053066 | 0.001835 | -0.26146 | 0.058494 | 0.539471 | -0.12163 | 0.404363 | 0.01148  |

|                           |          |          |          |          |          |          |          |          |          |
|---------------------------|----------|----------|----------|----------|----------|----------|----------|----------|----------|
| <b>Level of education</b> | -0.27805 | 0.117356 | 0.022963 | -0.01347 | -0.0461  | 0.068553 | -0.09298 | 0.017582 | 0.001687 |
| <b>Ledings</b>            | -0.04053 | -0.0826  | -0.05893 | -0.06494 | 0.116316 | -0.0278  | -0.01552 | 0.019084 | -0.01826 |
| <b>Family</b>             | -0.20385 | -0.33972 | -0.44851 | 0.002547 | 0.13537  | 0.062652 | 0.25222  | -0.03707 | -0.17176 |

## 2.2 PC Regression Social Identity with depended variable Life Satisfaction 2019-2020 (1305x28)

| Residuals: |         |        |        |        |
|------------|---------|--------|--------|--------|
| Min        | 1Q      | Median | 3Q     | Max    |
| -4.204     | -0.2075 | 0.053  | 0.2726 | 3.0418 |

| Coefficients: |           |            |         |          |     |
|---------------|-----------|------------|---------|----------|-----|
|               | Estimate  | Std. Error | t value | Pr(> t ) |     |
| (Intercept)   | -1.38E-16 | 1.63E-02   | 0       | 1        |     |
| PC1           | -1.08E-01 | 7.72E-03   | -13.98  | < 2e-16  | *** |
| PC2           | 1.52E-02  | 8.92E-03   | 1.702   | 0.088983 | .   |
| PC3           | -1.54E-01 | 1.16E-02   | -13.372 | < 2e-16  | *** |
| PC4           | 4.53E-01  | 1.33E-02   | 34.098  | < 2e-16  | *** |
| PC5           | -1.87E-02 | 1.46E-02   | -1.282  | 0.199904 |     |
| PC6           | 1.66E-01  | 1.51E-02   | 10.974  | < 2e-16  | *** |
| PC7           | -5.72E-02 | 1.56E-02   | -3.669  | 0.000253 | *** |
| PC8           | 9.44E-03  | 1.60E-02   | 0.588   | 0.556337 |     |
| PC9           | 4.99E-02  | 1.63E-02   | 3.06    | 0.002263 | **  |
| PC10          | 1.88E-02  | 1.70E-02   | 1.105   | 0.269269 |     |
| PC11          | -9.52E-02 | 1.75E-02   | -5.452  | 5.97E-08 | *** |
| PC12          | -1.39E-01 | 1.82E-02   | -7.627  | 4.69E-14 | *** |
| PC13          | 1.84E-01  | 1.86E-02   | 9.905   | < 2e-16  | *** |
| PC14          | 5.22E-02  | 1.86E-02   | 2.803   | 0.005134 | **  |
| PC15          | 7.97E-02  | 1.91E-02   | 4.186   | 3.03E-05 | *** |
| PC16          | 1.20E-02  | 1.97E-02   | 0.61    | 0.541946 |     |
| PC17          | 2.14E-01  | 2.00E-02   | 10.714  | < 2e-16  | *** |
| PC18          | -4.11E-01 | 2.04E-02   | -20.167 | < 2e-16  | *** |
| PC19          | 2.59E-02  | 2.07E-02   | 1.249   | 0.211918 |     |
| PC20          | -6.62E-02 | 2.14E-02   | -3.097  | 0.001995 | **  |
| PC21          | -6.10E-03 | 2.15E-02   | -0.284  | 0.776736 |     |
| PC22          | 1.41E-02  | 2.22E-02   | 0.635   | 0.525622 |     |
| PC23          | 7.06E-02  | 2.24E-02   | 3.146   | 0.001691 | **  |
| PC24          | 4.16E-02  | 2.29E-02   | 1.811   | 0.070373 | .   |
| PC25          | -9.19E-02 | 2.40E-02   | -3.829  | 0.000135 | *** |
| PC26          | 7.43E-02  | 2.49E-02   | 2.981   | 0.002928 | **  |
| PC27          | 1.09E-01  | 2.56E-02   | 4.259   | 2.21E-05 | *** |

|      |          |          |       |          |    |
|------|----------|----------|-------|----------|----|
| PC28 | 8.78E-02 | 2.68E-02 | 3.277 | 0.001079 | ** |
| PC29 | 3.04E-03 | 2.75E-02 | 0.111 | 0.91175  |    |

Signif. codes: 0 '\*\*\*' 0.001 '\*\*' 0.01 '\*' 0.05 '.' 0.1 ' ' 1

Residual standard error: 0.588 on 1275 degrees of freedom

Multiple R-squared: 0.662, Adjusted R-squared: 0.6543

F-statistic: 86.1 on 29 and 1275 DF, p-value: < 2.2e-16

## 2.3 Regression of variables with loadings ( $\geq 0.30$ ) which belong to statistically significant PC

### 2.3.1 Regression Social Identity with depended variable Life Satisfaction 2019-2020 (1305x28)

| Residuals: |         |        |        |        |
|------------|---------|--------|--------|--------|
| Min        | 1Q      | Median | 3Q     | Max    |
| -4.204     | -0.2075 | 0.053  | 0.2726 | 3.0418 |

| Coefficients:                     |          |            |         |          |     |
|-----------------------------------|----------|------------|---------|----------|-----|
|                                   | Estimate | Std. Error | t value | Pr(> t ) |     |
| (Intercept)                       | -2.9631  | 0.170812   | -17.347 | < 2e-16  | *** |
| Happiness                         | 0.372956 | 0.009011   | 41.389  | < 2e-16  | *** |
| Security                          | -0.01172 | 0.02132    | -0.55   | 0.582712 |     |
| Creativity                        | 0.004475 | 0.017961   | 0.249   | 0.803289 |     |
| Equitability                      | 0.017907 | 0.018828   | 0.951   | 0.341756 |     |
| Inequality                        | 0.026871 | 0.019407   | 1.385   | 0.166406 |     |
| Megalothymia                      | -0.00986 | 0.01574    | -0.626  | 0.531257 |     |
| Religiosity                       | 0.012454 | 0.008105   | 1.536   | 0.124671 |     |
| Tradition                         | -0.00942 | 0.019242   | -0.489  | 0.624708 |     |
| Adherence to rules                | -0.04166 | 0.0236     | -1.765  | 0.077732 | .   |
| Acknowledgment of external values | 0.000832 | 0.014452   | 0.058   | 0.954111 |     |
| Having a good time                | -0.01427 | 0.016381   | -0.871  | 0.383875 |     |
| The role of migrants              | 0.003452 | 0.023301   | 0.148   | 0.882237 |     |
| Role of state                     | 0.013626 | 0.015043   | 0.906   | 0.365185 |     |
| Cultural change                   | 0.023272 | 0.00899    | 2.589   | 0.009748 | **  |
| Altruism                          | -0.00855 | 0.019615   | -0.436  | 0.663014 |     |
| Environment                       | 0.036539 | 0.020471   | 1.785   | 0.074512 | .   |
| Trust                             | 0.01101  | 0.007982   | 1.379   | 0.16803  |     |
| Motive for wealth accumulation    | 0.012836 | 0.013679   | 0.938   | 0.348242 |     |
| Surprises                         | -0.02705 | 0.016006   | -1.69   | 0.091289 | .   |
| Makes decisions                   | -0.00212 | 0.020325   | -0.104  | 0.916907 |     |
| Successful                        | 0.018567 | 0.01641    | 1.131   | 0.258089 |     |

|                           |          |          |        |          |     |
|---------------------------|----------|----------|--------|----------|-----|
| Seeks adventure           | 0.005367 | 0.014725 | 0.364  | 0.71555  |     |
| Political self-definition | 0.005356 | 0.008435 | 0.635  | 0.525563 |     |
| State of health           | -0.08212 | 0.02154  | -3.812 | 0.000144 | *** |
| Income status             | -0.00577 | 0.005172 | -1.117 | 0.264395 |     |
| Age                       | 0.035922 | 0.013025 | 2.758  | 0.005899 | **  |
| Level of education        | 0.026705 | 0.009779 | 2.731  | 0.006406 | **  |
| Ledings                   | 0.049883 | 0.01576  | 3.165  | 0.001586 | **  |
| Family                    | 0.042599 | 0.02376  | 1.793  | 0.073228 | .   |

Signif. codes: 0 '\*\*\*' 0.001 '\*\*' 0.01 '\*' 0.05 '.' 0.1 ' ' 1

Residual standard error: 0.588 on 1275 degrees of freedom

Multiple R-squared: 0.662, Adjusted R-squared: 0.6543

F-statistic: 86.1 on 29 and 1275 DF, p-value: < 2.2e-16

### 2.3.2 Regression Social Identity with Dependent Variable Life Satisfaction 2019-2020 (1305x6)

| Residuals: |         |        |        |       |
|------------|---------|--------|--------|-------|
| Min        | 1Q      | Median | 3Q     | Max   |
| -4.1204    | -0.2215 | 0.0516 | 0.2708 | 3.156 |

| Coefficients:      |          |            |         |          |     |
|--------------------|----------|------------|---------|----------|-----|
|                    | Estimate | Std. Error | t value | Pr(> t ) |     |
| (Intercept)        | -2.75546 | 0.098708   | -27.915 | < 2e-16  | *** |
| Happiness          | 0.382487 | 0.00855    | 44.736  | < 2e-16  | *** |
| Cultural change    | 0.016984 | 0.007163   | 2.371   | 0.017878 | *   |
| State of health    | -0.08089 | 0.021008   | -3.851  | 0.000124 | *** |
| Age                | 0.043798 | 0.011827   | 3.703   | 0.000222 | *** |
| Level of education | 0.022745 | 0.009388   | 2.423   | 0.015533 | *   |
| Ledings            | 0.048319 | 0.015444   | 3.129   | 0.001795 | **  |

Signif. codes: 0 '\*\*\*' 0.001 '\*\*' 0.01 '\*' 0.05 '.' 0.1 ' ' 1

Residual standard error: 0.5893 on 1298 degrees of freedom

Multiple R-squared: 0.6543, Adjusted R-squared: 0.6527

F-statistic: 409.4 on 6 and 1298 DF, p-value: < 2.2e-16

3. From the social identity variables, we remove the dependent variable of Life Satisfaction and the statistically significant variables shaping life satisfaction from section 2.3.2. We analyze further the remaining of the variables below by calculating the correlation matrices.

### 3.1 Correlation Matrix for the variable Happiness

|                                   | Happiness |
|-----------------------------------|-----------|
| Security                          | -0.03886  |
| Creativity                        | -0.20681  |
| Equitability                      | -0.02272  |
| Inequality                        | 0.112361  |
| Megalothymia                      | -0.1326   |
| Religiosity                       | 0.048116  |
| Tradition                         | 0.018687  |
| Adherence to rules                | -0.05527  |
| Acknowledgment of external values | 0.093153  |
| Having a good time                | -0.10193  |
| The role of migrants              | -0.02074  |
| Role of state                     | 0.038318  |
| Altruism                          | 0.024624  |
| Environment                       | -0.0021   |
| Trust                             | 0.136978  |
| Motive for wealth accumulation    | -0.04413  |
| Surprises                         | -0.19054  |
| Makes decisions                   | -0.00427  |
| Successful                        | -0.12284  |
| Seeks adventure                   | -0.10698  |
| Political self-definition         | 0.116354  |
| State of health                   | -0.30644  |
| Income status                     | 0.074938  |
| Age                               | -0.22749  |
| Level of education                | 0.042866  |
| Family                            | -0.01363  |

We now use the variables correlated with happiness with a percentage higher than 10% and run regression.

### 3.1.1 Regression with depended variable Happiness 2019-2020 (1305x11)

| Residuals: |         |        |        |       |
|------------|---------|--------|--------|-------|
| Min        | 1Q      | Median | 3Q     | Max   |
| -3.2631    | -0.5197 | 0.0531 | 0.5942 | 2.612 |

| Coefficients:             |          |            |         |          |     |
|---------------------------|----------|------------|---------|----------|-----|
|                           | Estimate | Std. Error | t value | Pr(> t ) |     |
| (Intercept)               | 0.199874 | 0.130305   | 1.534   | 0.125301 |     |
| Creativity                | -0.06972 | 0.027277   | -2.556  | 0.010703 | *   |
| Inequality                | 0.101618 | 0.028348   | 3.585   | 0.00035  | *** |
| Megalothymia              | -0.01346 | 0.023795   | -0.565  | 0.571865 |     |
| Having a good time        | 0.005818 | 0.023945   | 0.243   | 0.808073 |     |
| Trust                     | 0.044747 | 0.012296   | 3.639   | 0.000284 | *** |
| Surprises                 | -0.07831 | 0.024601   | -3.183  | 0.001491 | **  |
| Successful                | -0.02299 | 0.025231   | -0.911  | 0.362334 |     |
| Seeks adventure           | 0.065468 | 0.022028   | 2.972   | 0.003013 | **  |
| Political self-definition | 0.054666 | 0.011897   | 4.595   | 4.75E-06 | *** |
| State of health           | -0.22246 | 0.03288    | -6.766  | 2.00E-11 | *** |
| Age                       | -0.06079 | 0.019288   | -3.152  | 0.001661 | **  |

Signif. codes: 0 '\*\*\*' 0.001 '\*\*' 0.01 '\*' 0.05 '.' 0.1 ' ' 1

Residual standard error: 0.9228 on 1293 degrees of freedom

Multiple R-squared: 0.1555, Adjusted R-squared: 0.1484

F-statistic: 21.65 on 11 and 1293 DF, p-value: < 2.2e-16

### 3.1.2 Regression with depended variable Happiness 2019-2020 (1305x8)

| Residuals: |        |        |        |        |
|------------|--------|--------|--------|--------|
| Min        | 1Q     | Median | 3Q     | Max    |
| -3.2445    | -0.527 | 0.0535 | 0.5922 | 2.6085 |

| Coefficients:   |          |            |         |          |     |
|-----------------|----------|------------|---------|----------|-----|
|                 | Estimate | Std. Error | t value | Pr(> t ) |     |
| (Intercept)     | 0.1571   | 0.12471    | 1.26    | 0.20801  |     |
| Creativity      | -0.07718 | 0.02655    | -2.907  | 0.003709 | **  |
| Inequality      | 0.10309  | 0.02824    | 3.651   | 0.000272 | *** |
| Trust           | 0.04433  | 0.01228    | 3.61    | 0.000317 | *** |
| Surprises       | -0.08215 | 0.02413    | -3.405  | 0.000682 | *** |
| Seeks adventure | 0.05938  | 0.02093    | 2.838   | 0.004617 | **  |

|                                  |          |         |        |          |     |
|----------------------------------|----------|---------|--------|----------|-----|
| <b>Political self-definition</b> | 0.05498  | 0.01188 | 4.63   | 4.03E-06 | *** |
| <b>State of health</b>           | -0.22319 | 0.03285 | -6.795 | 1.65E-11 | *** |
| <b>Age</b>                       | -0.06091 | 0.01928 | -3.16  | 0.001615 | **  |

Signif. codes: 0 '\*\*\*' 0.001 '\*\*' 0.01 '\*' 0.05 '.' 0.1 ' ' 1

Residual standard error: 0.9225 on 1296 degrees of freedom

Multiple R-squared: 0.1543, Adjusted R-squared: 0.1491

F-statistic: 29.56 on 8 and 1296 DF, p-value: < 2.2e-16

### 3.2 Correlation Matrix for the variable Cultural Change

|                                   | Cultural change |
|-----------------------------------|-----------------|
| Security                          | 0.120236674     |
| Creativity                        | -0.056363338    |
| Equitability                      | -0.003411579    |
| Inequality                        | 0.013166131     |
| Megalothymia                      | -0.03783783     |
| Religiosity                       | -0.260861825    |
| Tradition                         | 0.29289233      |
| Adherence to rules                | 0.172574351     |
| Acknowledgment of external values | 0.146982331     |
| Having a good time                | 0.068372037     |
| The role of migrants              | -0.571270347    |
| Role of state                     | -0.003151097    |
| Altruism                          | 0.032356185     |
| Environment                       | 0.00930957      |
| Trust                             | 0.046921164     |
| Motive for wealth accumulation    | 0.065116131     |
| Surprises                         | -0.019952279    |
| Makes decisions                   | 0.006352657     |
| Successful                        | -0.039624486    |
| Seeks adventure                   | -0.006895625    |
| Political self-definition         | -0.250826263    |
| State of health                   | -0.148710236    |
| Income status                     | 0.096203537     |
| Age                               | -0.189024208    |
| Level of education                | 0.131181177     |
| Family                            | 0.218099974     |

We now use the variables correlated with cultural change with a percentage higher than 10% and run regression

### 3.2.1 Regression with dependent variable cultural change 2019-2020 (1305x11)

| Residuals: |         |         |        |        |
|------------|---------|---------|--------|--------|
| Min        | 1Q      | Median  | 3Q     | Max    |
| -3.4079    | -0.5087 | -0.0531 | 0.4755 | 3.3457 |

| Coefficients:                     |            |            |         |          |     |
|-----------------------------------|------------|------------|---------|----------|-----|
|                                   | Estimate   | Std. Error | t value | Pr(> t ) |     |
| (Intercept)                       | 1.798061   | 0.181312   | 9.917   | < 2e-16  | *** |
| Security                          | 0.0192366  | 0.027637   | 0.696   | 0.48653  |     |
| Religiosity                       | -0.0089327 | 0.010689   | -0.836  | 0.4035   |     |
| Tradition                         | 0.0992135  | 0.024835   | 3.995   | 6.84E-05 | *** |
| Adherence to rules                | -0.0212043 | 0.031646   | -0.67   | 0.50295  |     |
| Acknowledgment of external values | 0.0256153  | 0.018987   | 1.349   | 0.17755  |     |
| The role of migrants              | -0.5678604 | 0.02686    | -21.142 | < 2e-16  | *** |
| Political self-definition         | -0.029431  | 0.011135   | -2.643  | 0.00831  | **  |
| State of health                   | -0.0715943 | 0.027896   | -2.566  | 0.01039  | *   |
| Age                               | 0.0043424  | 0.01656    | 0.262   | 0.79319  |     |
| Level of education                | -0.0006591 | 0.013128   | -0.05   | 0.95997  |     |
| Family                            | 0.0535764  | 0.031813   | 1.684   | 0.0924   | .   |

Signif. codes: 0 '\*\*\*' 0.001 '\*\*' 0.01 '\*' 0.05 '.' 0.1 ' ' 1

Residual standard error: 0.7998 on 1293 degrees of freedom

Multiple R-squared: 0.3658, Adjusted R-squared: 0.3604

F-statistic: 67.79 on 11 and 1293 DF, p-value: < 2.2e-16

### 3.2.2 Regression with depended variable Cultural Change 2019-2020 (1305x4)

| Residuals: |         |         |        |       |
|------------|---------|---------|--------|-------|
| Min        | 1Q      | Median  | 3Q     | Max   |
| -3.3826    | -0.5149 | -0.0603 | 0.4902 | 3.381 |

| Coefficients:             |          |            |         |          |     |
|---------------------------|----------|------------|---------|----------|-----|
|                           | Estimate | Std. Error | t value | Pr(> t ) |     |
| (Intercept)               | 1.93358  | 0.12143    | 15.923  | < 2e-16  | *** |
| Tradition                 | 0.12381  | 0.02041    | 6.066   | 1.71E-09 | *** |
| The role of migrants      | -0.57435 | 0.02634    | -21.806 | < 2e-16  | *** |
| Political self-definition | -0.03417 | 0.01064    | -3.212  | 0.00135  | **  |
| State of health           | -0.07564 | 0.02386    | -3.17   | 0.00156  | **  |



Signif. codes: 0 '\*\*\*' 0.001 '\*\*' 0.01 '\*' 0.05 '.' 0.1 ' ' 1

Residual standard error: 0.7995 on 1300 degrees of freedom

Multiple R-squared: 0.3628, Adjusted R-squared: 0.3608

F-statistic: 185 on 4 and 1300 DF, p-value: < 2.2e-16

### 3.3 Correlation Matrix for the variable Lending

|                                   | Ledings  |
|-----------------------------------|----------|
| Security                          | 0.030229 |
| Creativity                        | -0.06611 |
| Equitability                      | 0.023127 |
| Inequality                        | 0.073792 |
| Megalothymia                      | -0.04271 |
| Religiosity                       | -0.04067 |
| Tradition                         | 0.072581 |
| Adherence to rules                | 0.036969 |
| Acknowledgment of external values | 0.081127 |
| Having a good time                | -0.05965 |
| The role of migrants              | -0.01453 |
| Role of state                     | 0.025769 |
| Altruism                          | 0.00328  |
| Environment                       | 0.038403 |
| Trust                             | 0.081393 |
| Motive for wealth accumulation    | -0.08817 |
| Surprises                         | -0.02622 |
| Makes decisions                   | -0.02654 |
| Successful                        | -0.06895 |
| Seeks adventure                   | -0.09757 |
| Political self-definition         | 0.019222 |
| State of health                   | -0.06585 |
| Income status                     | 0.160034 |
| Age                               | -0.10405 |
| Level of education                | 0.060708 |
| Family                            | 0.026657 |

We now use the variables correlated with cultural change with a percentage higher than 10% and run regression

#### 3.3.1 Regression with depended variable Lending (1305x2)

| Residuals: |         |         |        |        |
|------------|---------|---------|--------|--------|
| Min        | 1Q      | Median  | 3Q     | Max    |
| -1.6002    | -0.9447 | -0.1882 | 0.6559 | 3.7102 |

| Coefficients:        |          |            |         |          |     |
|----------------------|----------|------------|---------|----------|-----|
|                      | Estimate | Std. Error | t value | Pr(> t ) |     |
| <b>(Intercept)</b>   | -0.03371 | 0.088783   | -0.38   | 0.7042   |     |
| <b>Income status</b> | 0.043416 | 0.008382   | 5.18    | 2.58E-07 | *** |
| <b>Age</b>           | -0.04428 | 0.016775   | -2.64   | 0.0084   | **  |

Signif. codes: 0 '\*\*\*' 0.001 '\*\*' 0.01 '\*' 0.05 '.' 0.1 ' ' 1

Residual standard error: 0.9852 on 1302 degrees of freedom

Multiple R-squared: 0.0308, Adjusted R-squared: 0.02931

F-statistic: 20.69 on 2 and 1302 DF, p-value: 1.432e-09
